# Supplementary material for: Antiplatelet therapy for patients with COVID-19: Systematic review and meta-analysis of observational studies and randomized controlled trials
Source: PubMed Central journal article supplement (PMC9490267; doi:10.3389/fmed.2022.965790), 2022-09-07
Supplement: Data_Sheet_2.pdf [file Data_Sheet_2.pdf]

## *Supplementary file 2*

### **This word file includes:**

**Table S1** Quality assessment of the included observational studies by Newcastle-Ottawa scale

**Figure S1** Sensitivity analysis of pooled analysis

**Figure S2** Subgroup analysis of the included studies based on original effect size

**Figure S3** Subgroup analysis of the included studies based on study center

**Figure S4** Subgroup analysis of the included studies based on illness severity

**Figure S5** Subgroup analysis of the included studies based on antiplatelet agents

**Figure S6** Subgroup analysis of the included studies based on treatment timing

**Figure S7** Subgroup analysis of the included studies based on anticoagulants use

**Figure S8** Funnel plot for publication bias tests

## Supplementary Table and Figures

**Table S1** | Quality assessment of the included observational studies by the Newcastle–Ottawa scale

| Cohort Studies     |                |                   |                           |                     |               |                       |                     |                       |             |
|--------------------|----------------|-------------------|---------------------------|---------------------|---------------|-----------------------|---------------------|-----------------------|-------------|
| Study              | Selection      |                   |                           |                     | Comparability | Outcome               |                     |                       | Total score |
|                    | Exposed Cohort | Nonexposed Cohort | Ascertainment of exposure | Outcome of interest |               | Assessment of outcome | Length of follow-up | Adequacy of follow-up |             |
| Aydinyilmaz (41)   | 1              | 1                 | 0                         | 1                   | 1             | 1                     | 1                   | 1                     | 7           |
| Chow (42)          | 1              | 1                 | 1                         | 1                   | 1             | 1                     | 1                   | 1                     | 8           |
| Corrochano (43)    | 1              | 1                 | 1                         | 1                   | 1             | 1                     | 1                   | 1                     | 8           |
| Fröhlich (44)      | 1              | 1                 | 1                         | 1                   | 1             | 1                     | 1                   | 1                     | 8           |
| Gupta (45)         | 1              | 1                 | 0                         | 1                   | 1             | 1                     | 1                   | 1                     | 7           |
| Aghajani (46)      | 1              | 1                 | 1                         | 1                   | 1             | 1                     | 0                   | 1                     | 7           |
| Ho (47)            | 1              | 1                 | 1                         | 1                   | 1             | 1                     | 1                   | 1                     | 8           |
| Izzi-Engbeaya (48) | 1              | 0                 | 0                         | 1                   | 1             | 1                     | 1                   | 1                     | 6           |
| Liu (49)           | 1              | 1                 | 1                         | 1                   | 1             | 1                     | 1                   | 1                     | 8           |
| Matli (50)         | 1              | 1                 | 1                         | 1                   | 1             | 1                     | 1                   | 1                     | 8           |
| Meizlish (51)      | 1              | 1                 | 1                         | 1                   | 1             | 1                     | 1                   | 1                     | 8           |
| Merzon (52)        | 1              | 1                 | 1                         | 1                   | 1             | 1                     | 0                   | 1                     | 7           |
| Mura (53)          | 1              | 1                 | 1                         | 1                   | 1             | 1                     | 0                   | 0                     | 6           |
| Osborne (54)       | 1              | 1                 | 1                         | 1                   | 1             | 1                     | 1                   | 1                     | 8           |
| Pan (55)           | 1              | 1                 | 1                         | 1                   | 1             | 1                     | 1                   | 1                     | 8           |
| Russo (56)         | 1              | 1                 | 1                         | 1                   | 1             | 1                     | 1                   | 1                     | 8           |
| Sahai (57)         | 1              | 1                 | 1                         | 1                   | 1             | 1                     | 0                   | 1                     | 7           |
| Santoro (58)       | 1              | 1                 | 1                         | 1                   | 1             | 1                     | 1                   | 1                     | 8           |
| Sisinni (59)       | 1              | 1                 | 1                         | 1                   | 1             | 1                     | 1                   | 1                     | 8           |
| Soldevila (60)     | 1              | 1                 | 1                         | 1                   | 1             | 1                     | 1                   | 1                     | 8           |
| Terlecki (61)      | 1              | 1                 | 1                         | 1                   | 1             | 1                     | 1                   | 1                     | 8           |
| Tremblay (62)      | 1              | 1                 | 1                         | 1                   | 1             | 1                     | 1                   | 1                     | 8           |
| Zhao (63)          | 1              | 1                 | 1                         | 1                   | 1             | 1                     | 1                   | 1                     | 8           |

### References

41. Aydinyilmaz F, Aksakal E, Pamukcu HE, Aydemir S, Doğan R, Saraç İ, et al. Significance of MPV, RDW and PDW with the Severity and Mortality of COVID-19 and Effects of Acetylsalicylic Acid Use. *Clin Appl Thromb Hemost.* (2021) 27: 10760296211048808. doi:10.1177/10760296211048808
42. Chow JH, Yin Y, Yamane DP, Davison D, Keneally RJ, Hawkins K, et al. Association of prehospital antiplatelet therapy with survival in patients hospitalized with COVID-19: A propensity score-matched analysis. *J Thromb Haemost.* (2021) 19: 2814-24. doi:10.1111/jth.15517
43. Corrochano M, Acosta-Isaac R, Mojal S, Miqueleiz S, Rodriguez D, Quijada-Manuitt M, et al. Impact of pre-admission antithrombotic therapy on disease severity and mortality in patients

- hospitalized for COVID-19. *J Thromb Thrombolysis*. (2021): 1-7. doi:10.1007/s11239-021-02507-2
44. Fröhlich GM, Jeschke E, Eichler U, Thiele H, Alhariri L, Reinthaler M, et al. Impact of oral anticoagulation on clinical outcomes of COVID-19: a nationwide cohort study of hospitalized patients in Germany. *Clin Res Cardiol*. (2021) 110: 1041-50. doi:10.1007/s00392-020-01783-x
  45. Gupta A, Madhavan MV, Poterucha TJ, Defilippis EM, Hennessey JA, Redfors B, et al. Association between antecedent statin use and decreased mortality in hospitalized patients with COVID-19. *Nat Commun*. (2021) 12: 1325. doi:10.1038/s41467-021-21553-1
  46. Haji Aghajani M, Moradi O, Amini H, Azhdari Tehrani H, Pourheidar E, Rabiei MM, et al. Decreased in-hospital mortality associated with aspirin administration in hospitalized patients due to severe COVID-19. *J Med Virol*. (2021) 93: 5390-5. doi:10.1002/jmv.27053
  47. Ho G, Dusendang JR, Schmittziel J, Kavecansky J, Tavakoli J, Pai A. Association of chronic anticoagulant and antiplatelet use on disease severity in SARS-COV-2 infected patients. *J Thromb Thrombolysis*. (2021) 52: 476-81. doi:10.1007/s11239-021-02383-w
  48. Izzi-Engbeaya C, Distaso W, Amin A, Yang W, Idowu O, Kenkre JS, et al. Adverse outcomes in COVID-19 and diabetes: a retrospective cohort study from three London teaching hospitals. *BMJ Open Diabetes Res Care*. (2021) 9. doi:10.1136/bmjdr-2020-001858
  49. Liu Q, Huang N, Li A, Zhou Y, Liang L, Song X, et al. Effect of low-dose aspirin on mortality and viral duration of the hospitalized adults with COVID-19. *Medicine (Baltimore)*. (2021) 100: e24544. doi:10.1097/md.00000000000024544
  50. Matli K, Chamoun N, Fares A, Zibara V, Al-Osta S, Nasrallah R, et al. Combined anticoagulant and antiplatelet therapy is associated with an improved outcome in hospitalised patients with COVID-19: a propensity matched cohort study. *Open Heart*. (2021) 8. doi:10.1136/openhrt-2021-001785
  51. Meizlish ML, Goshua G, Liu Y, Fine R, Amin K, Chang E, et al. Intermediate-dose anticoagulation, aspirin, and in-hospital mortality in COVID-19: A propensity score-matched analysis. *Am J Hematol*. (2021) 96: 471-9. doi:10.1002/ajh.26102
  52. Merzon E, Green I, Vinker S, Golan-Cohen A, Gorohovski A, Avramovich E, et al. The use of aspirin for primary prevention of cardiovascular disease is associated with a lower likelihood of COVID-19 infection. *Febs j*. (2021) 288: 5179-89. doi:10.1111/febs.15784
  53. Mura C, Preissner S, Nahles S, Heiland M, Bourne PE, Preissner R. Real-world evidence for improved outcomes with histamine antagonists and aspirin in 22,560 COVID-19 patients. *Signal Transduct Target Ther*. (2021) 6: 267. doi:10.1038/s41392-021-00689-y
  54. Osborne TF, Veigulis ZP, Arreola DM, Mahajan SM, Roosli E, Curtin CM. Association of mortality and aspirin prescription for COVID-19 patients at the Veterans Health Administration. *PLoS ONE*. (2021) 16. doi:10.1371/journal.pone.0246825
  55. Pan D, Ip A, Zhan S, Wasserman I, Snyder DJ, Agathis AZ, et al. Pre-hospital antiplatelet medication use on COVID-19 disease severity. *Heart Lung*. (2021) 50: 618-21. doi:10.1016/j.hrtlng.2021.04.010
  56. Russo V, Di Maio M, Attena E, Silverio A, Scudiero F, Celentani D, et al. Clinical impact of pre-admission antithrombotic therapy in hospitalized patients with COVID-19: A multicenter observational study. *Pharmacol Res*. (2020) 159: 104965. doi:10.1016/j.phrs.2020.104965
  57. Sahai A, Bhandari R, Godwin M, McIntyre T, Chung MK, Iskandar JP, et al. Effect of aspirin on short-term outcomes in hospitalized patients with COVID-19. *Vasc Med*. (2021):

1358863x211012754. doi:10.1177/1358863x211012754

58. Santoro F, Nuñez-Gil IJ, Vitale E, Viana-Llamas MC, Reche-Martinez B, Romero-Pareja R, et al. Antiplatelet therapy and outcome in COVID-19: the Health Outcome Predictive Evaluation Registry. *Heart*. (2021). doi:10.1136/heartjnl-2021-319552
59. Sisinni A, Rossi L, Battista A, Poletti E, Battista F, Battista RA, et al. Pre-admission acetylsalicylic acid therapy and impact on in-hospital outcome in COVID-19 patients: The ASA-CARE study. *Int J Cardiol*. (2021) 344: 240-5. doi:10.1016/j.ijcard.2021.09.058
60. Soldevila L, Valerio-Sallent L, Roure S, Pérez-Quílez O, Mas M, Miralles R, et al. Drug exposure may have a substantial influence on COVID-19 prognosis among residents of long-term care facilities: an exploratory analysis. *Int J Infect Dis*. (2021) 109: 192-4. doi:10.1016/j.ijid.2021.07.007
61. Terlecki M, Wojciechowska W, Klocek M, Olszanecka A, Stolarz-Skrzypek K, Grodzicki T, et al. Association between cardiovascular disease, cardiovascular drug therapy, and in-hospital outcomes in patients with COVID-19: Data from a large single-center registry in Poland. *Kardiologia Polska*. (2021) 79: 773-80. doi:10.33963/KP.15990
62. Tremblay D, Van Gerwen M, Alsen M, Thibaud S, Kessler A, Venugopal S, et al. Impact of anticoagulation prior to COVID-19 infection: a propensity score-matched cohort study. *Blood*. (2020) 136: 144-7. doi:10.1182/blood.2020006941
63. Zhao X, Gao C, Dai F, Treggiari MM, Deshpande R, Meng L. Treatments Associated with Lower Mortality among Critically Ill COVID-19 Patients. *Anesthesiology*. (2021). doi:10.1097/aln.0000000000003999

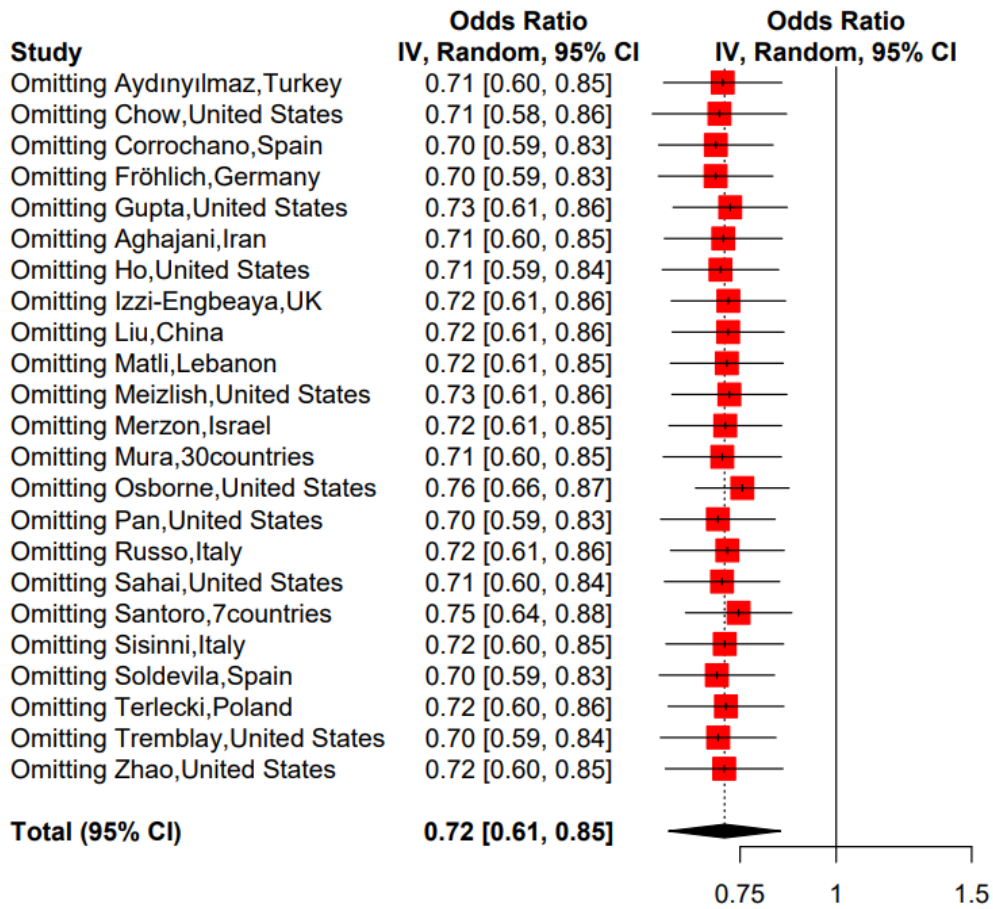

**Figure S1** | Sensitivity analysis of the pooled analysis

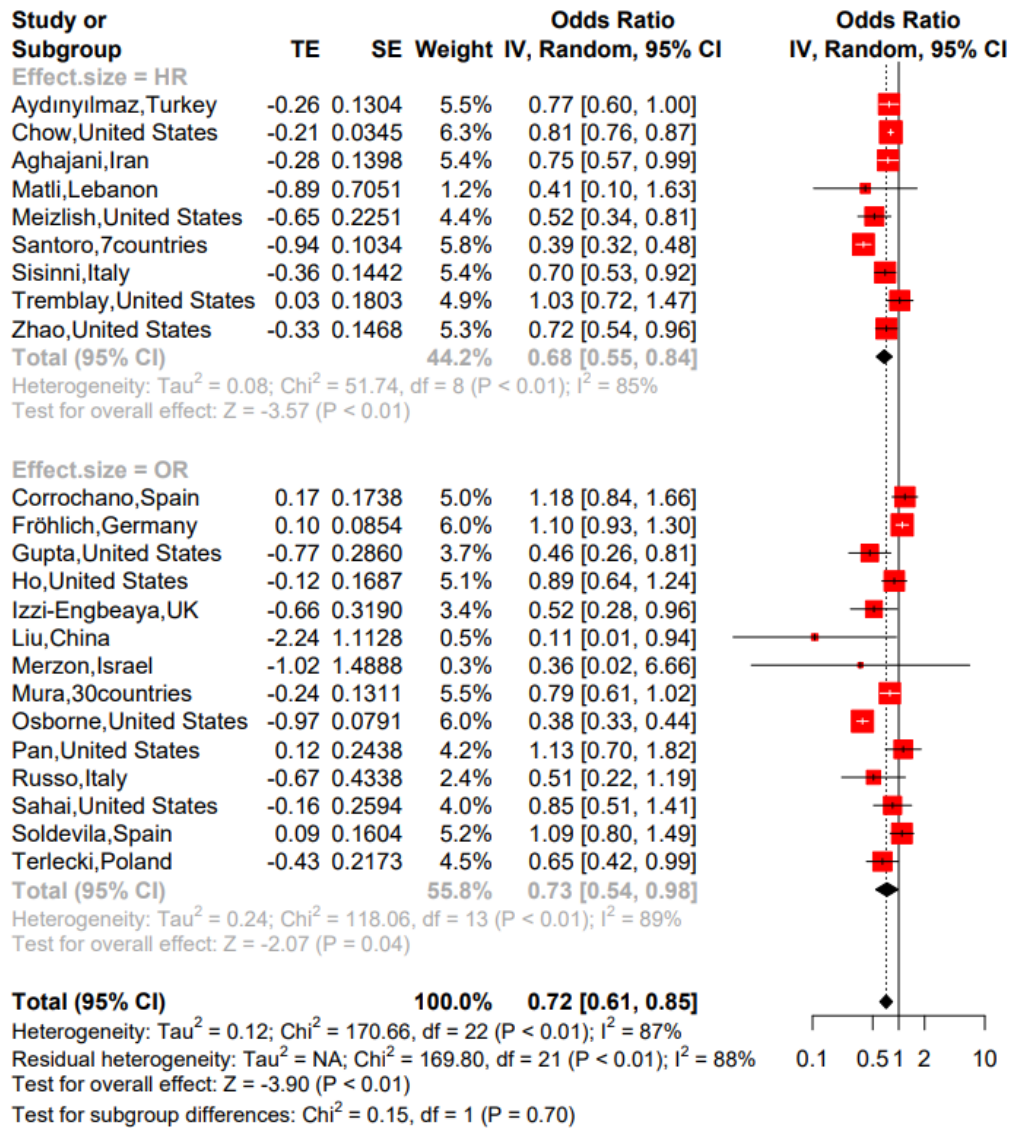

**Figure S2 | Subgroup analysis of the included studies based on the original effect size**

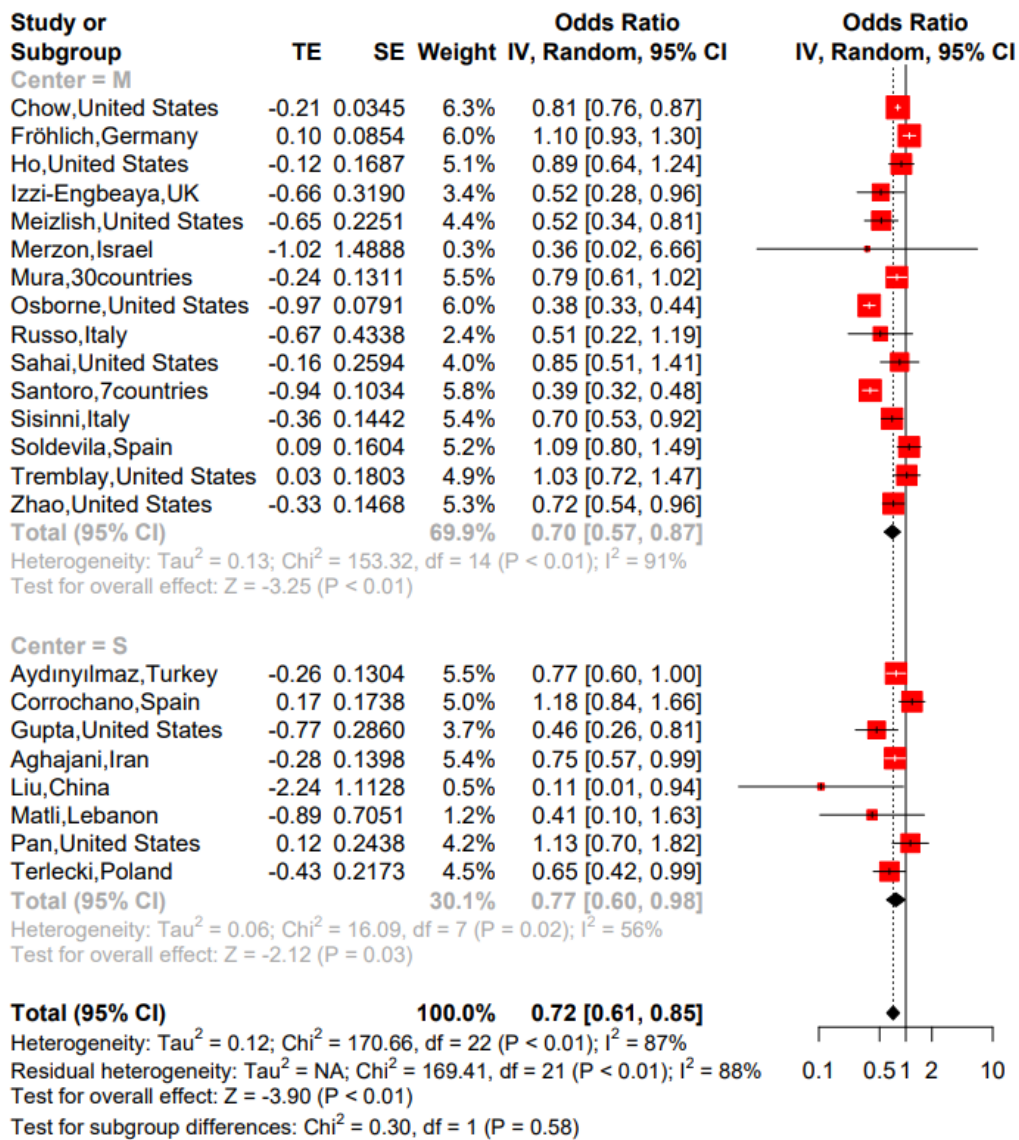

**Figure S3** | Subgroup analysis of the included studies based on the study center

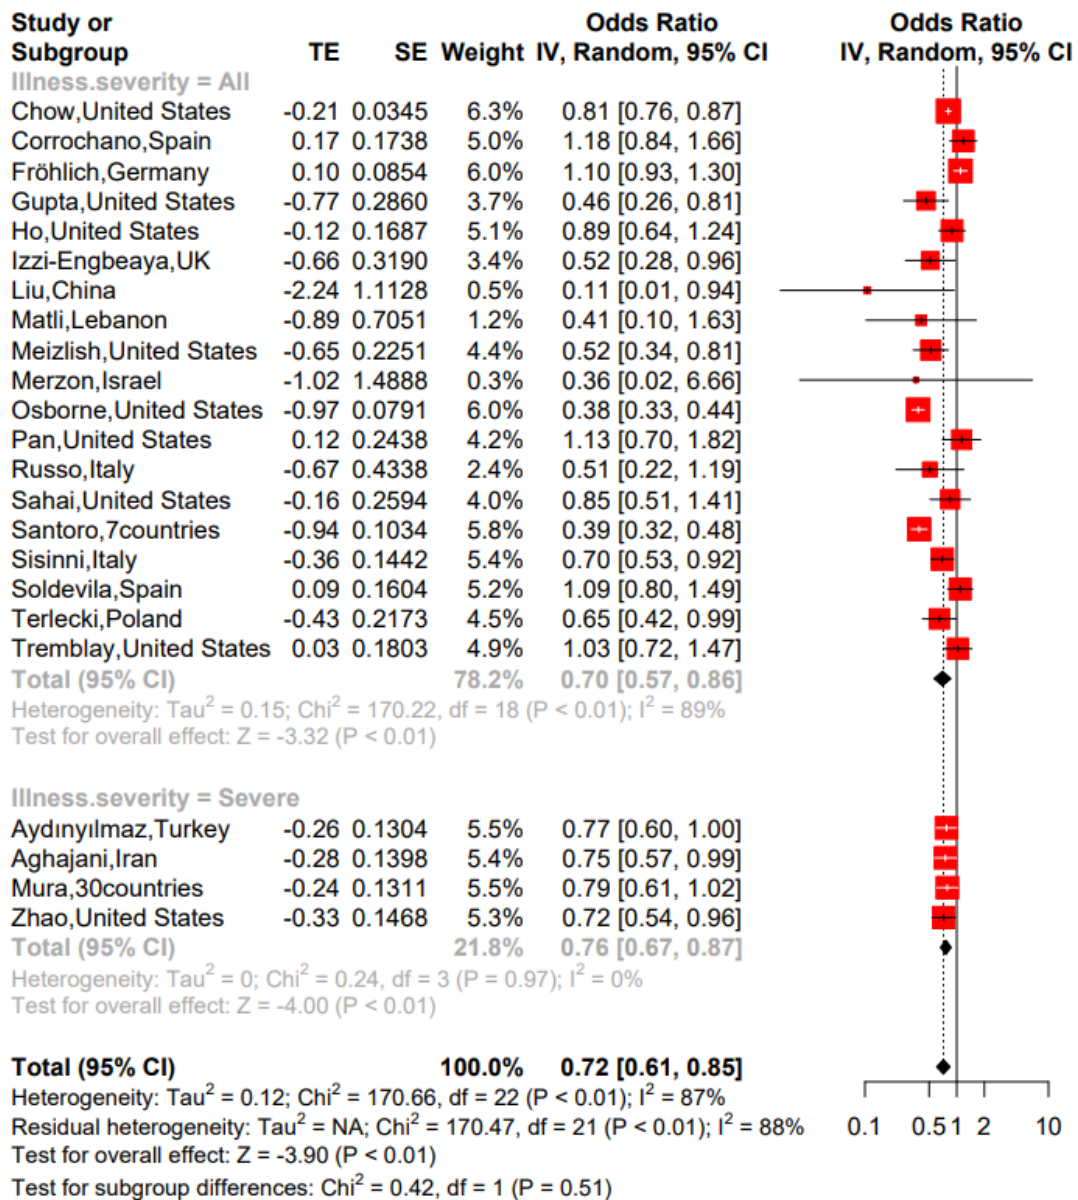

**Figure S4** | Subgroup analysis of the included studies based on illness severity



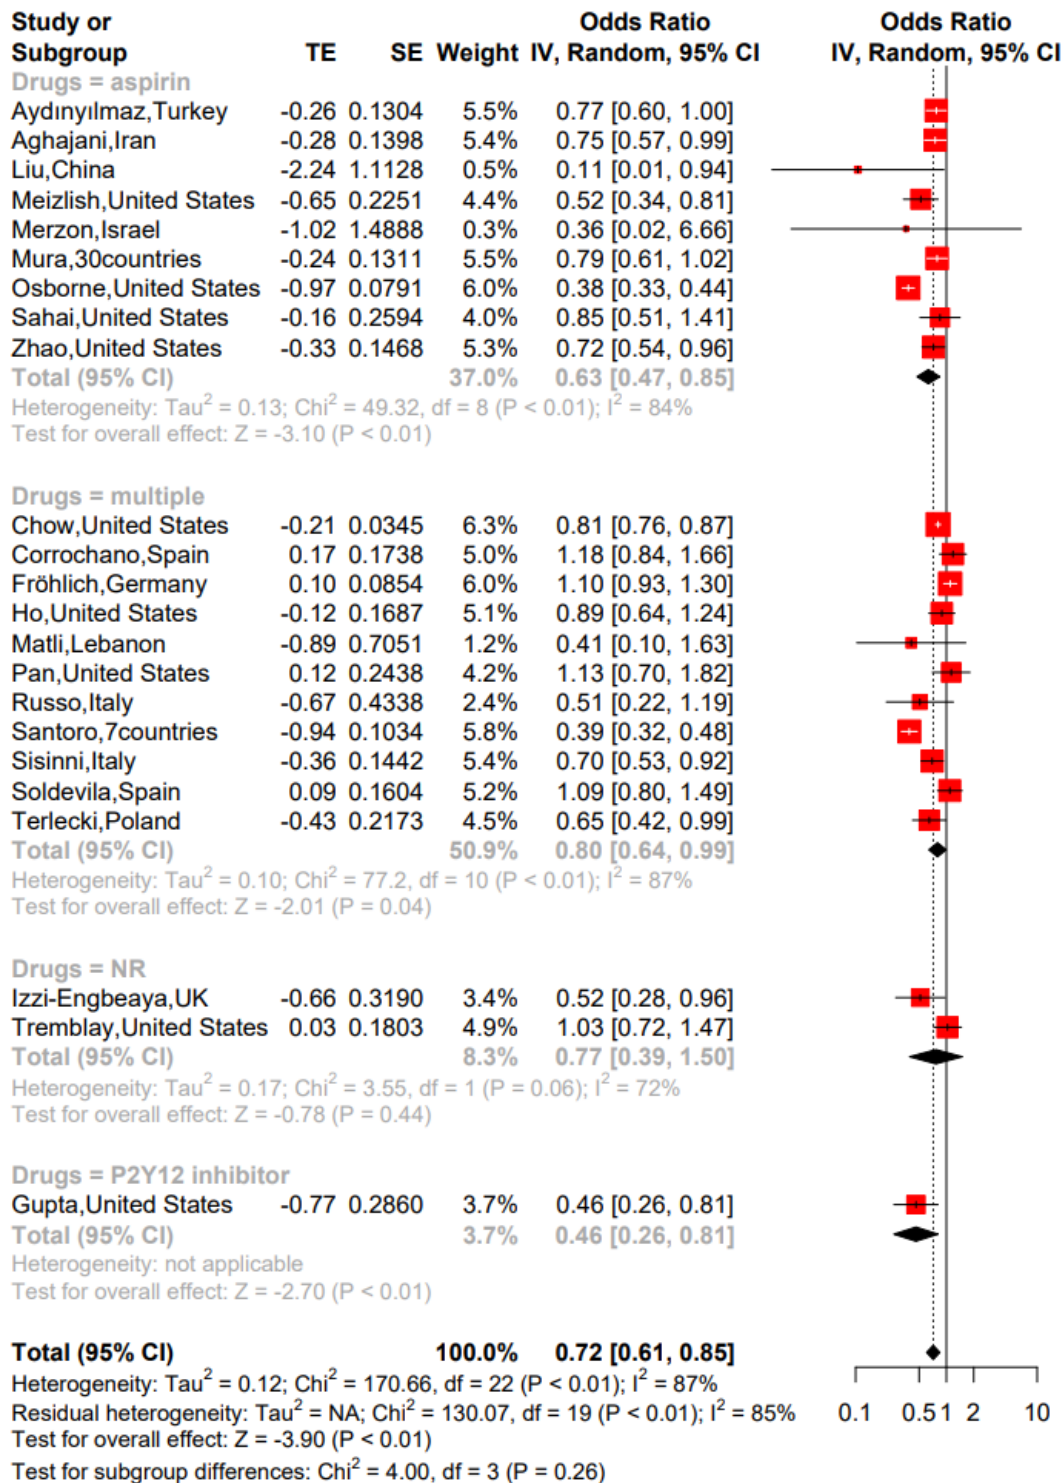

**Figure S5** | Subgroup analysis of the included studies based on antiplatelet agents

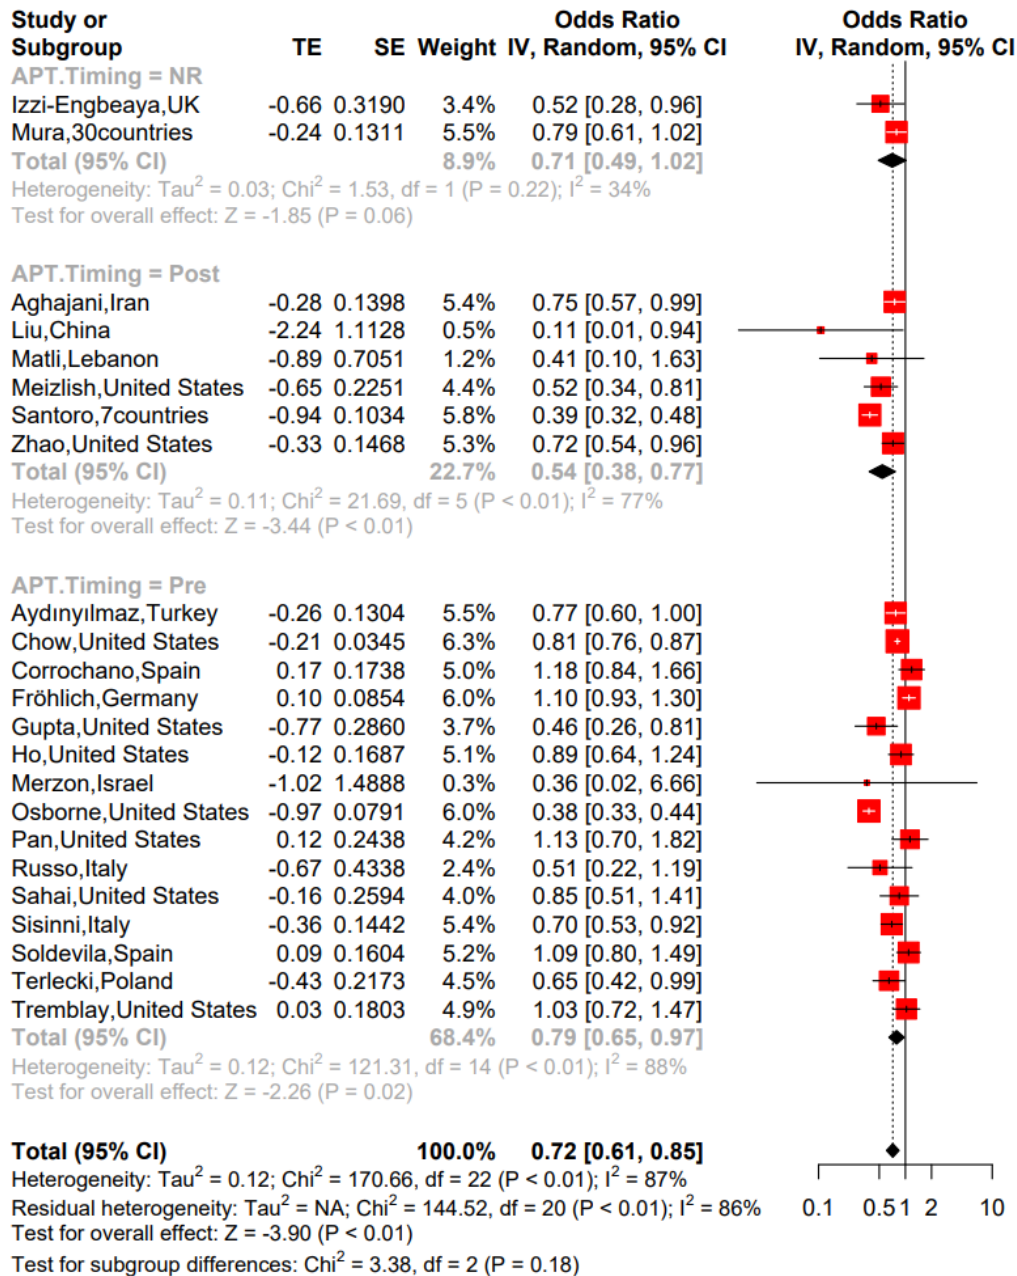

**Figure S6** | Subgroup analysis of the included studies based on treatment timing

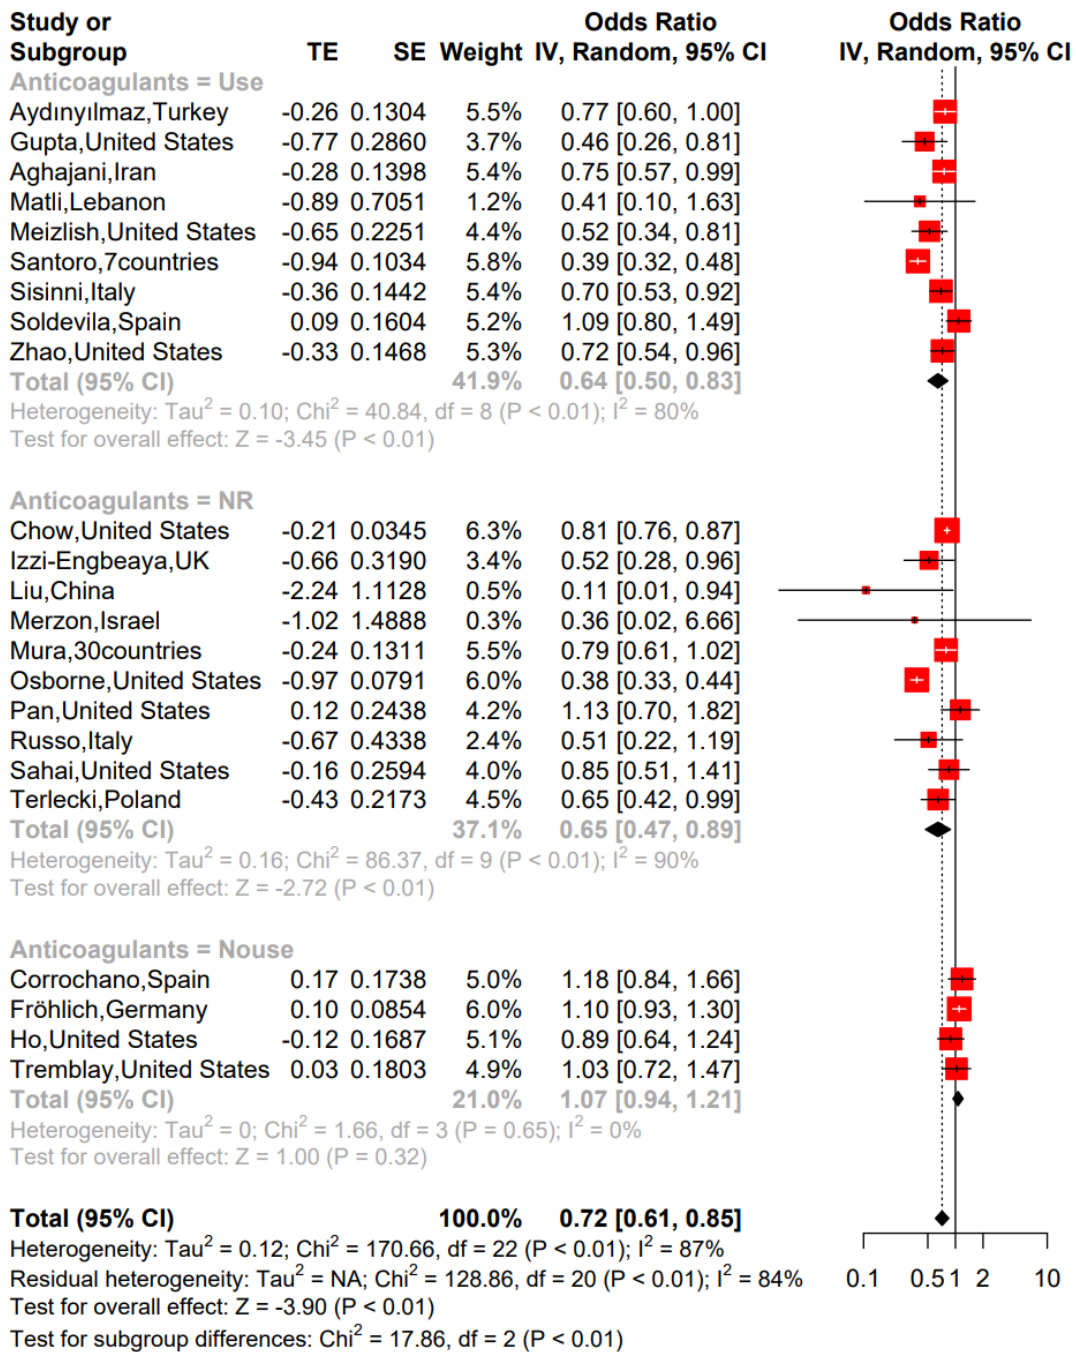

**Figure S7 | Subgroup analysis of the included studies based on anticoagulant use**

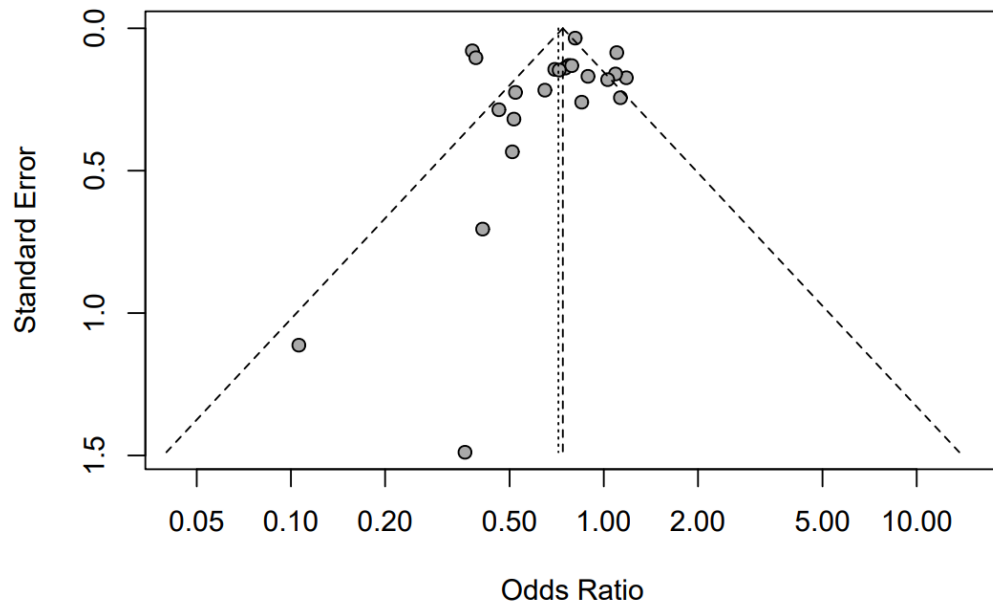

**Figure S8** | Funnel plot for the publication bias tests
